# Prevalence of Abnormal Glucose Tolerance and Risk Factors in Urban and Rural Malaysia

NORLAILA MUSTAFA, MD<sup>1</sup>  
 NOR AZMI KAMARUDIN, FACE<sup>1</sup>  
 AB AZIZ ISMAIL, PHD<sup>2</sup>  
 AMIR SHARIFUDDIN KHIR, MD<sup>3</sup>  
 IKRAM SHAH ISMAIL, PHD<sup>4</sup>  
 KAMARUL IMRAN MUSA, MPH<sup>2</sup>

KHALID ABDUL KADIR, PHD<sup>5</sup>  
 NOR AZWANY YAACOB, MPH<sup>2</sup>  
 OSMAN ALI, PHD<sup>6</sup>  
 SITI HARNIDA MD ISA, MRCP<sup>5</sup>  
 WAN MOHAMAD WAN BEBAKAR, MD<sup>2</sup>  
 WAN NAZAIMOON WAN MOHAMUD, PHD<sup>7</sup>

**OBJECTIVE**—To determine the prevalence of prediabetes and diabetes among rural and urban Malaysians.

**RESEARCH DESIGN AND METHODS**—This cross-sectional survey was conducted among 3,879 Malaysian adults (1,335 men and 2,544 women). All subjects underwent the 75-g oral glucose tolerance test (OGTT).

**RESULTS**—The overall prevalence of prediabetes was 22.1% (30.2% in men and 69.8% in women). Isolated impaired fasting glucose (IFG) and impaired glucose tolerance (IGT) were found in 3.4 and 16.1% of the study population, respectively, whereas 2.6% of the subjects had both IFG and IGT. Based on an OGTT, the prevalence of newly diagnosed type 2 diabetes was 12.6% (31.0% in men and 69.0% in women). The prediabetic subjects also had an increased prevalence of cardiovascular disease risk factors.

**CONCLUSIONS**—The large proportion of undiagnosed cases of prediabetes and diabetes reflects the lack of public awareness of the disease.

*Diabetes Care* 34:1362–1364, 2011

The prevalence of type 2 diabetes has increased globally over the past two decades. In Malaysia, the National Health and Morbidity Survey (NHMS) 2006 (Z. Hussein, W.M.W.B., W.N.w.M., G.R. Letchuman, J. Hasan, F. Ismail, N. Mohd Nor, G.H. Tee, and M.R. Ishak; NHMS III Diabetes Study Group, unpublished data) recorded a diabetes prevalence of 14.9% among adults aged >30 years. This is an astounding increase from a similar survey conducted in 1996. Despite this rising prevalence and increasing awareness, diabetes is often left undetected (1). Early recognition and prevention is therefore important because diabetes is associated with

unhealthy contemporary lifestyle (2). Impaired glucose tolerance (IGT) and impaired fasting glucose (IFG) identify individuals at increased risk for developing diabetes and cardiovascular disease (CVD) (3,4). Because of increased awareness, IGT is being diagnosed and reported more frequently, resulting in the higher prevalence of IGT compared with a few decades ago. Using the 75-g oral glucose tolerance test (OGTT) would identify those individuals with IGT and diabetes based on 2-h postprandial blood glucose values. The aim of this study was therefore to determine the prevalence of prediabetes and diabetes using a 75-g OGTT

in both rural and urban areas in Malaysia and to identify the metabolic abnormalities and risk factors associated with these conditions.

## RESEARCH DESIGN AND METHODS

This nationwide, cross-sectional study was conducted from April until August of 2008 among Malaysians aged  $\geq 18$  years. The subjects were randomly selected with the aid of the kirschtals and the topographical charts of the district. Written consents were obtained. Ethical approval for the study was obtained from the medical research and ethics committee of the Ministry of Health, Malaysia.

An OGTT and other biochemical tests, as well as anthropometric measurements, were performed. Blood samples were processed on the same day and transported to a central laboratory in the Institute for Medical Research, Kuala Lumpur, and stored at  $-20^{\circ}\text{C}$  prior to additional analysis. Fasting plasma glucose; triglycerides; and HDL, LDL, and total cholesterol were analyzed using a Selectra XL chemistry analyzer. The interassay coefficients of variation for glucose at 6.27 and 15.6 mmol/L were 4.7 and 6.3%, respectively, and for lipids ranged from 3.5 to 6.4%.

EpiData version 3.1 was used for data entry, and data were then analyzed using SPSS version 17. Data were expressed as means  $\pm$  SD. Significant results were determined according to the two-tailed alternative hypothesis and deemed significant when the  $P$  value was  $< 0.05$ .

**RESULTS**—The prevalence of prediabetes among adults was 22.1%, affecting almost half (47.0%) of the adults aged between 30 and 49 years. The prevalence of isolated IGT was higher (16.1%) compared with isolated IFG (3.4%) and the combination of both IFG and IGT (2.6%). Subjects with both IFG and IGT had higher waist circumference and BMI compared with those with isolated IFG or IGT (Table 1). Among overweight adults (BMI  $\geq 23$  kg/m<sup>2</sup>) with prediabetes, 17.3% had isolated IGT, 3.8% had isolated IFG, and 3.1% had both IFG and IGT. For those

From the <sup>1</sup>Department of Medicine, Universiti Kebangsaan Malaysia, Jalan Yaacob Latiff, Bandar Tun Razak, Cheras, Kuala Lumpur, Malaysia; the <sup>2</sup>School of Medical Sciences, Universiti Sains Malaysia, Kelantan, Malaysia; the <sup>3</sup>Penang Medical College, Penang, Malaysia; the <sup>4</sup>Department of Medicine, University of Malaya, Kuala Lumpur, Malaysia; the <sup>5</sup>School of Medicine and Health Sciences, Monash University Malaysia, Bandar Sunway, Malaysia; the <sup>6</sup>Department of Medicine, Universiti Malaysia Sabah, Kota Kinabalu, Sabah, Malaysia; and the <sup>7</sup>Cardiovascular, Diabetes, and Nutrition Research Centre, Institute for Medical Research, Kuala Lumpur, Malaysia.

Corresponding author: Norlaila Mustafa, norlaila@ppukm.ukm.my.

Received 3 January 2011 and accepted 5 March 2011.

DOI: 10.2337/dc11-0005

© 2011 by the American Diabetes Association. Readers may use this article as long as the work is properly cited, the use is educational and not for profit, and the work is not altered. See <http://creativecommons.org/licenses/by-nc-nd/3.0/> for details.

Table 1—Demographic characteristics and biochemical parameters of the prediabetic and diabetic subjects

|                                 | Isolated IFG     | Isolated IGT    | IFG/IGT        | New diabetes    |
|---------------------------------|------------------|-----------------|----------------|-----------------|
| n (%)                           | 131 (3.4)        | 625 (16.1)      | 102 (2.6)      | 487 (12.6)      |
| Age (years)                     | 50.41 ± 13.43    | 49.75 ± 13.98†  | 50.44 ± 11.48  | 52.70 ± 12.78*  |
| Sex (%)                         |                  |                 |                |                 |
| Male                            | 66 (50.4)        | 164 (26.2)      | 29 (28.4)      | 151 (31.0)      |
| Female                          | 65 (49.6)        | 461 (73.8)      | 73 (71.6)      | 336 (69.0)      |
| Waist circumference (cm)        |                  |                 |                |                 |
| Male                            | 90.92 ± 10.47    | 90.98 ± 12.30   | 92.32 ± 10.11  | 93.47 ± 12.86   |
| Female                          | 85.04 ± 11.88†   | 85.88 ± 12.76†  | 90.73 ± 12.99# | 90.00 ± 12.41*  |
| BMI (kg/m <sup>2</sup> )        | 26.31 ± 4.50†    | 26.84 ± 5.42†   | 28.32 ± 5.64#  | 28.02 ± 5.62*   |
| Systolic blood pressure (mmHg)  | 137.24 ± 22.43   | 134.62 ± 23.60† | 140.98 ± 23.46 | 140.54 ± 23.43* |
| Diastolic blood pressure (mmHg) | 79.79 ± 12.30    | 80.63 ± 11.32   | 82.02 ± 11.15  | 83.45 ± 12.35*  |
| Fasting plasma glucose (mmol/L) | 6.41 ± 0.24      | 5.04 ± 0.70†    | 6.43 ± 0.24    | 8.22 ± 3.26*    |
| 2-HPP (mmol/L)                  | 6.31 ± 1.05†     | 8.97 ± 0.86†    | 9.09 ± 0.83    | 13.87 ± 5.49*   |
| A1C (%)                         | 5.48 ± 0.81      | 5.45 ± 0.49†    | 5.57 ± 0.41    | 6.72 ± 1.95*    |
| Total cholesterol (mmol/L)      | 6.15 ± 1.30      | 5.82 ± 1.26†    | 6.04 ± 1.22    | 6.19 ± 1.33     |
| HDL (mmol/L)                    | 1.36 ± 0.32      | 1.38 ± 0.39     | 1.33 ± 0.37    | 1.34 ± 0.37     |
| LDL (mmol/L)                    | 3.76 ± 1.04      | 3.70 ± 1.14†    | 3.75 ± 1.02    | 3.86 ± 1.22     |
| Triglycerides (mmol/L)          | 1.72 ± 1.18      | 1.60 ± 1.04†    | 1.60 ± 1.01    | 2.01 ± 1.52*    |
| Uric acid (mmol/L)              | 380.20 ± 124.55† | 325.27 ± 101.46 | 349.83 ± 86.51 | 334.21 ± 97.66  |

Data are means ± SD or n (%). \**P* < 0.05 between IFG and new diabetes. †*P* < 0.05 between IFG and IFG/IGT. ‡*P* < 0.05 between IGT and new diabetes. #*P* < 0.05 between IGT and IFG/IGT. 2-HPP, 2-h postprandial.

with both IFG and IGT, the prevalence of CVD risk factors was high (65.7% had dyslipidaemia, 52.0% had hypertension, 76.5% had abdominal obesity [ $>90$  cm for men and  $>80$  cm for women], 82.4% had BMI  $\geq 23$  kg/m<sup>2</sup>, and 10.8% were current smokers). Using multiple logistic regression analysis, prediabetes was found to be associated with a history of smoking, age, and the low-income group.

The prevalence of newly diagnosed type 2 diabetes was 12.6% (31.0% in men and 69.0% in women) and increased with age from 3.8% among adults aged  $<30$  years to 11.6% among adults aged 40–49 years and was still higher (16.5%) in the older age-group ( $\geq 60$  years). Without relying on the OGTT, we would have missed ~5% of type 2 diabetes cases.

**CONCLUSIONS**—Glucose intolerance in this study is defined according to the World Health Organization diagnostic criteria (5). The prevalence of prediabetes in our study is comparable to other similar studies (6,7), and the percentage rose to 24.4% in those aged  $\geq 60$  years. Interestingly, the prevalence of IFG was lower than IGT in studied populations. Similarly, IGT was found to be more prevalent compared with IFG in Mauritius (8), in the U.S. (9), and in Pima Indians (10).

In our study, ~16.1% of adults had isolated IGT, a condition that increases

the risk for diabetes and other cardiovascular risk factors (11). In fact, many subjects with IGT will develop CVD before progressing to diabetes, as shown in one Japanese study (12). Changes in lifestyle and dietary habits in our population, in both rural and in urban areas, have resulted in the increased prevalence of risk factors for CVD, such as obesity, hypertension, and diabetes. Our prediabetic subjects had a high risk for CVD. This is not to be unexpected because prediabetes is a prelude to type 2 diabetes and is also associated with various comorbidities, which has been termed metabolic syndrome.

The prevalence of newly diagnosed type 2 diabetes in our study was 12.6% and is increasing with age. This high prevalence of undiagnosed diabetes, together with its earlier age of onset ( $<30$  years), poses a serious public health problem, especially if there is no serious concerted effort taken to improve it. By performing the OGTT, we were able to diagnose more subjects with type 2 diabetes because it captured both fasting and elevated 2-h plasma glucose levels.

In summary, the high prevalence of glucose intolerance among adults aged  $>18$  years has raised public health concerns. Because individuals with prediabetes usually have no apparent clinical symptoms, great efforts may be needed to identify them early and to intervene

against the root causes of insulin resistance, such as overweight, physical inactivity, and unhealthy diet in pediatric primary care and through public health services.

**Acknowledgments**—This study was funded by the National Institutes of Health, Ministry of Health Malaysia (06-CAM-02-1).

No potential conflicts of interest relevant to this article were reported.

N.M. wrote the manuscript and researched data. N.A.K. reviewed and edited the manuscript and researched data. A.A.I., A.S.K., and I.S.I. researched data. K.I.M. and K.A.K. researched data and contributed to discussion. N.A.Y., O.A., and S.H.M.I. researched data. W.M.W.B. and W.N.w.M. researched data and contributed to discussion.

The authors thank the Director General of Health Malaysia and the Deputy Director General of Health (Research and Technical Support) for permission to publish this article. The authors also thank the staff of the Universiti Kebangsaan Malaysia Medical Centre who helped with the project and went to the field (Norasyikin Wahab, Suehazlyn Zainudin, Wong Ming, Nor Shaffinaz, Norhaliza Ali, Rabizah Zain, Kamarulzaman Hasan, Nurul Hani Mat, Fadlin Mender, and Amiliyaton Razali).

## References

- Harris MI, Klein R, Welborn TA, Knudman MW. Onset of NIDDM occurs at least 4–7 yr before clinical diagnosis. *Diabetes Care* 1992;15:815–819

2. Narayan KM, Bowman BA, Engelgau ME. Prevention of type 2 diabetes. *BMJ* 2001; 323:63–64
3. Harris MI. Impaired glucose tolerance: prevalence and conversion to NIDDM. *Diabet Med* 1996;13(Suppl. 2):S9–S11
4. American Diabetes Association. Diagnosis and classification of diabetes mellitus. *Diabetes Care* 2005;28(Suppl. 1):S37–S42
5. World Health Organization. *Definition, Diagnosis, and Classification of Diabetes Mellitus and Its Complications. Part 1: Diagnosis and Classification of Diabetes Mellitus*. Geneva, World Health Org., 1999
6. Davies MJ, Gray IP. Impaired glucose tolerance. *BMJ* 1996;312:264–265
7. Yang W, Lu J, Weng J, et al.; China National Diabetes and Metabolic Disorders Study Group. Prevalence of diabetes among men and women in China. *N Engl J Med* 2010;362:1090–1101
8. Shaw JE, Zimmet PZ, de Courten M, et al. Impaired fasting glucose or impaired glucose tolerance: what best predicts future diabetes in Mauritius? *Diabetes Care* 1999; 22:399–402
9. Harris MI, Flegal KM, Cowie CC, et al. Prevalence of diabetes, impaired fasting glucose, and impaired glucose tolerance in U.S. adults: the Third National Health and Nutrition Examination Survey, 1988–1994. *Diabetes Care* 1998;21:518–524
10. Gabir MM, Hanson RL, Dabelea D, et al. The 1997 American Diabetes Association and 1999 World Health Organization criteria for hyperglycemia in the diagnosis and prediction of diabetes. *Diabetes Care* 2000;23:1108–1112
11. Levitzky YS, Pencina MJ, D'Agostino RB, et al. Impact of impaired fasting glucose on cardiovascular disease: the Framingham Heart Study. *J Am Coll Cardiol* 2008; 51:264–270
12. Hashimoto K, Ikewaki K, Yagi H, et al. Glucose intolerance is common in Japanese patients with acute coronary syndrome who were not previously diagnosed with diabetes. *Diabetes Care* 2005;28:1182–1186
